# Supplementary material for: Needle-like CoO nanowire composites with NiO nanosheets on carbon cloth for hybrid flexible supercapacitors and overall water splitting electrodes
Source: Royal Society of Chemistry journal article supplement (doi:10.1039/d0ra07307e), 2020-01-01
Supplement: d0ra07307e1.pdf [file d0ra07307e1.pdf]

## Supporting Information

### **Needle-like CoO nanowires composite with NiO nanosheets on carbon cloth for hybrid flexible supercapacitors and overall water splitting electrodes**

Sa Li<sup>a,b</sup>, Ruichao Feng<sup>a,c</sup>, Mai Li<sup>a\*</sup>, Xuan Zhao<sup>a</sup>, Beihe Zhang<sup>a</sup>, Yuan Liang<sup>a</sup>, Huanpo  
Ning<sup>a</sup>, Jiale Wang<sup>a</sup>, Hunrui Wang<sup>a</sup> and Paul K. Chu<sup>d</sup>

<sup>a</sup> College of Science, Donghua University, Shanghai 201620, People's Republic of  
China

<sup>b</sup> Department of Materials Processing and Control Engineering, University of Science  
and Technology Beijing, 30 Xueyuan Road, Haidian District, Beijing 100083, People's  
Republic of China

<sup>c</sup> Physics Department, Shanghai University of Electric Power, People's Republic of  
China

<sup>d</sup> Department of Physics, Department of Materials Science and Engineering, and  
Department of Biomedical Engineering, City University of Hong Kong, Tat Chee  
Avenue, Kowloon, Hong Kong, China

\* Corresponding author: E-mail: [limai@dhu.edu.cn](mailto:limai@dhu.edu.cn) (M. Li)

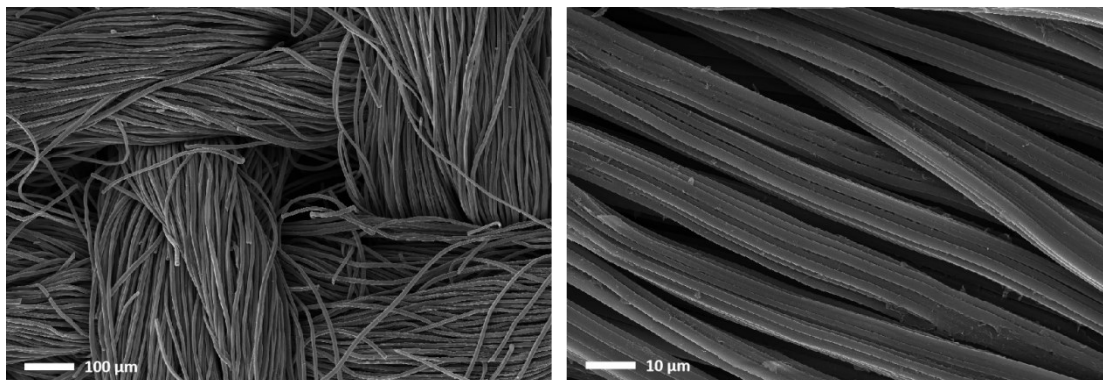

Fig. S1. SEM of carbon cloth.

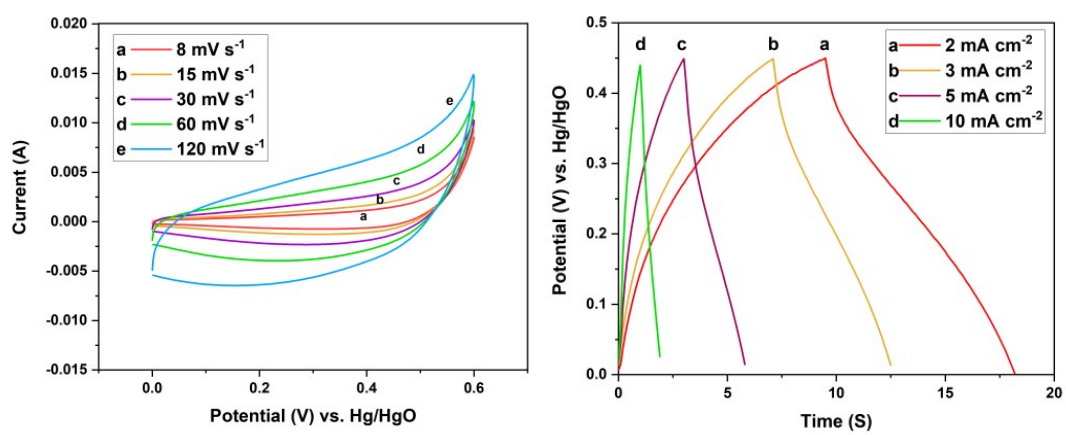

Fig. S2. CV (left) and GCD (right) plots of the CC electrode.

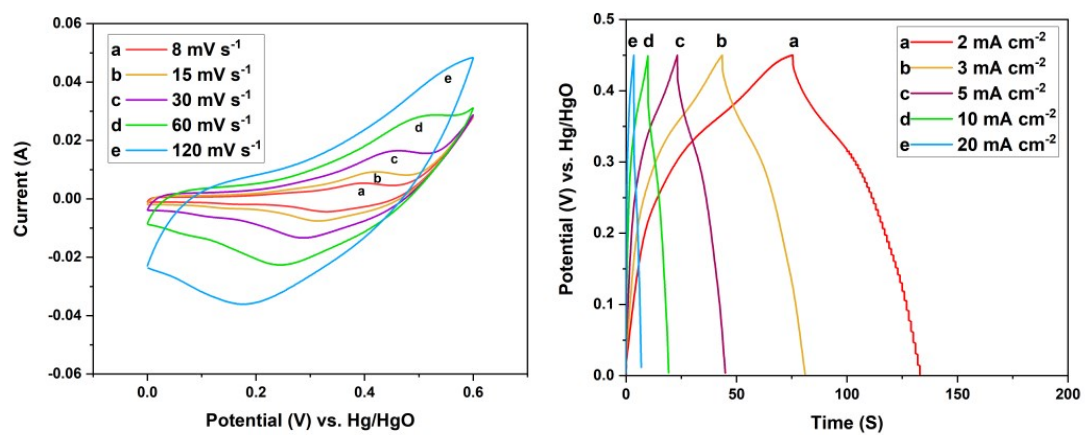

Fig. S3. CV (left) and GCD (right) plots of the CoO/CC electrode.

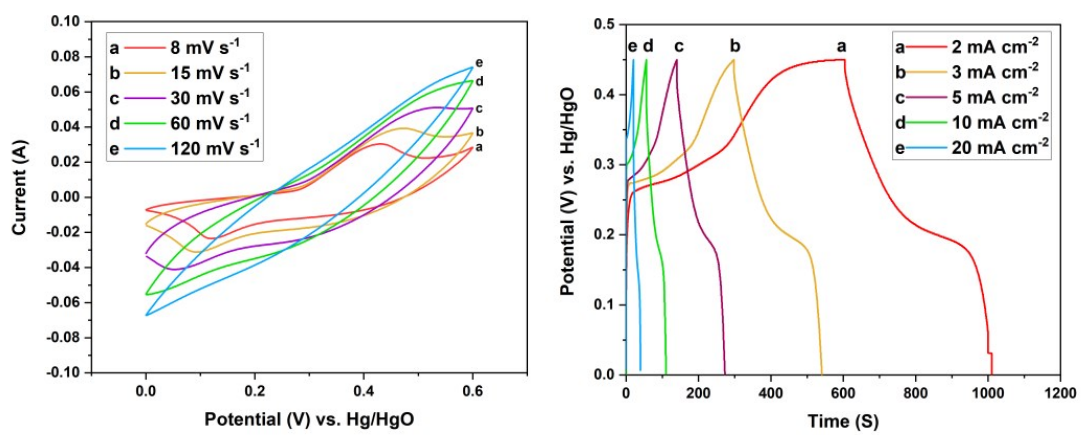

Fig. S4. CV (left) and GCD (right) plots of the NiO/CC electrode.

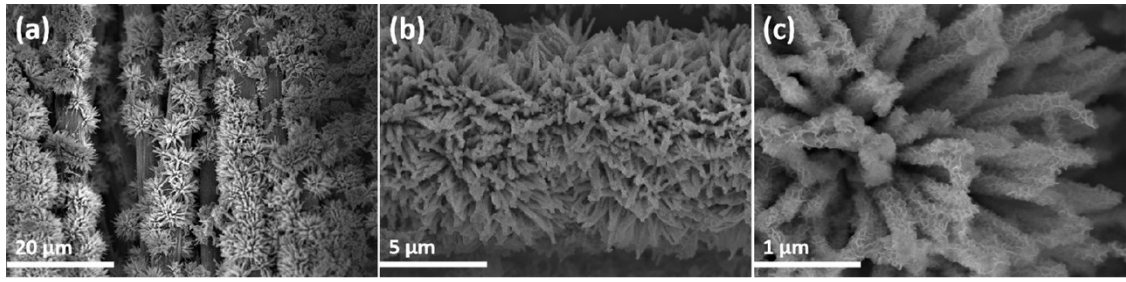

Fig. S5. SEM image of the NiO@CoO/CC electrode after long-term cycling.

Table. S1. Important EIS parameters of NiO@CoO/CC electrode (Sample 1 is the NiO@CoO/CC electrode before long-term cycling and sample 2 is the electrode after long-term cycling).

|   | $R_1$ | $R_2$ | $R_3$   | $CPE_1-T$ | $CPE_1-P$ | $CPE_2-T$ | $CPE_2-P$ | $W_1-R$ | $W_1-T$ | $W_1-P$ |
|---|-------|-------|---------|-----------|-----------|-----------|-----------|---------|---------|---------|
| 1 | 1.025 | 31.35 | 0.67107 | 0.04523   | 0.47944   | 0.000325  | 1.015     | -10.29  | 1.711   | 1.405   |
| 2 | 1.03  | 148.9 | 1.738   | 0.07728   | 0.50322   | 0.001725  | 0.79148   | -2.87   | 1.457   | 1.481   |

Table. S2. Important EIS parameters of the NiO@CoO/CC supercapacitors (Sample 1 is the NiO@CoO/CC supercapacitor before long-term cycling and sample 2 is the supercapacitor after long-term cycling).

|   | R <sub>1</sub> | R <sub>2</sub> | R <sub>3</sub> | CPE <sub>1</sub> -T | CPE <sub>1</sub> -P | CPE <sub>2</sub> -T | CPE <sub>2</sub> -P | CPE <sub>3</sub> -T | CPE <sub>3</sub> -P |
|---|----------------|----------------|----------------|---------------------|---------------------|---------------------|---------------------|---------------------|---------------------|
| 1 | 0.6593         | 0.1930         | 0.0085         | 0.8536              | 0.1176              | 0.0011              | 0.7761              | 1.3680              | 0.1790              |
| 2 | 0.6080         | 0.2270         | 0.2906         | 0.1877              | 0.2070              | 0.0064              | 0.5855              | 0.5309              | 0.2757              |



Table. S3. Important EIS parameters of different electrodes for water splitting.

|   | Electrode  | $R_1$ | $R_2$ | $CPE_1-T$ | $CPE_1-P$ |
|---|------------|-------|-------|-----------|-----------|
| 1 | CoO/CC     | 9.882 | 41.54 | 0.0054721 | 0.97719   |
| 2 | NiO/CC     | 4.572 | 180.3 | 0.0043956 | 0.78428   |
| 3 | NiO@CoO/CC | 10.54 | 11    | 0.0033744 | 0.809939  |

Table S4. Power density and Energy density of the NiO@CoO/CC supercapacitors and the supercapacitors from other related studies.

|    | Materials                                                                                    | Electrolytes | Power density<br>(W kg <sup>-1</sup> ) | Energy density<br>(Wh kg <sup>-1</sup> ) | Refs. |
|----|----------------------------------------------------------------------------------------------|--------------|----------------------------------------|------------------------------------------|-------|
| 1  | NiO@CoO/CC                                                                                   | 1M (KOH)     | 750                                    | 40.3                                     | -     |
| 2  | NiO/Graphite foam<br>carbon nanotube                                                         | 2M (KOH)     | 1060                                   | 23.4                                     | 1     |
| 3  | S-Co <sub>3</sub> O <sub>4</sub> @CoO/CC                                                     | 2M (KOH)     | 1000                                   | 33.06                                    | 2     |
| 4  | CoO/C                                                                                        | 6M (KOH)     | 398                                    | 30.9                                     | 3     |
| 5  | Ni(OH) <sub>2</sub> @Co <sub>3</sub> O <sub>4</sub>                                          | 3M (KOH)     | 346.9                                  | 40                                       | 4     |
| 6  | Ni(OH) <sub>2</sub> /<br>Graphene oxide                                                      | 6M (KOH)     | 467                                    | 44.1                                     | 5     |
| 7  | NiO                                                                                          | 2M (KOH)     | 600                                    | 13.74                                    | 6     |
| 8  | CoMoO <sub>4</sub> @NiMoO <sub>4</sub> /N<br>i foam                                          | 2M (KOH)     | 267                                    | 28.7                                     | 7     |
| 9  | CoMoO <sub>4</sub> @Co <sub>3</sub> O <sub>4</sub> /carb<br>on nanotubes                     | 2M (KOH)     | 6400                                   | 37.0                                     | 8     |
| 10 | Co <sub>3</sub> O <sub>4</sub> @NiMoO <sub>4</sub>                                           | 2M (KOH)     | 482                                    | 37.8                                     | 9     |
| 11 | CoMoO <sub>4</sub> @Co <sub>3</sub> O <sub>4</sub> /OM<br>EP                                 | 2M (KOH)     | 1647.5                                 | 45.98                                    | 10    |
| 12 | CoMoO <sub>4</sub> @NiMoO <sub>4</sub> ·x<br>H <sub>2</sub> O/Fe <sub>2</sub> O <sub>3</sub> | 2M (KOH)     | 12000                                  | 26.7                                     | 11    |

## References

- [1] C. Guan, Y. Wang, Y. Hu, J. Liu, K. H. Ho, W. Zhao, Z. Fan, Z. Shen, H. Zhang and J. Wang, *Journal of Materials Chemistry*, 2015, 3, 23283-23288.
- [2] Dai, S., Yuan, Y., Yu, J., Tang, J., *Nanoscale*, 2018, 10, 15454-15461.
- [3] N. Zhang, X. Yan, J. Li, J. Ma and D. H. L. Ng, *Electrochimica Acta*, 2017, 226, 132-139.
- [4] Bai, X., Liu, Q., Liu, J., Zhang, H., Li, Z., Jing, X., *Chemical Engineering Journal*, 2017, 315, 35-45.
- [5] Zhang, C., Chen, Q., Zhan, H., *ACS Applied Materials & Interfaces*, 2016, 8, 22977-22987.
- [6] Purushothaman, K. K., Babu, I. M., Sethuraman, B., Muralidharan, G., *ACS Applied Materials & Interfaces*, 2013, 5, 10767-10773.
- [7] Z. Zhang, H. Zhang, X. Zhang, D. Yu, Y. Ji, Q. Sun, Y. Wang, X. Liu, *Journal of Materials Chemistry A*, 2016, 4, 18578-18584.
- [8] J. Wang, X. Zhang, Q. Wei, H. Lv, Y. Tian, Z. Tong, X. Liu, J. Hao, H. Qu, J. Zhao, Y. Li, L. Mai, *Nano Energy*, 2016, 19, 222-233.
- [9] W. Hong, J. Wang, P. Gong, J. Sun, L. Niu, Z. Yang, Z. Wang, S. Yang, *Journal of Power Sources*, 2014, 270, 516-525.
- [10] M. Li, Y. Wang, H. Yang, P.K. Chu, *Journal of Materials Chemistry A*, 2017, 5, 17312-17324.
- [11] J. Wang, L. Zhang, X. Liu, X. Zhang, Y. Tian, X. Liu, J. Zhao, Y. Li, *Scientific Reports*, 2017, 7, 41088.
